# Supplementary material for: CircWAC induces chemotherapeutic resistance in triple-negative breast cancer by targeting miR-142, upregulating WWP1 and activating the PI3K/AKT pathway
Source: PubMed Central journal article supplement (PMC7919093; doi:10.1186/s12943-021-01332-8), 2021-03-01
Supplement: 12943_2021_1332_MOESM2_ESM.pdf [file 12943_2021_1332_MOESM2_ESM.pdf]

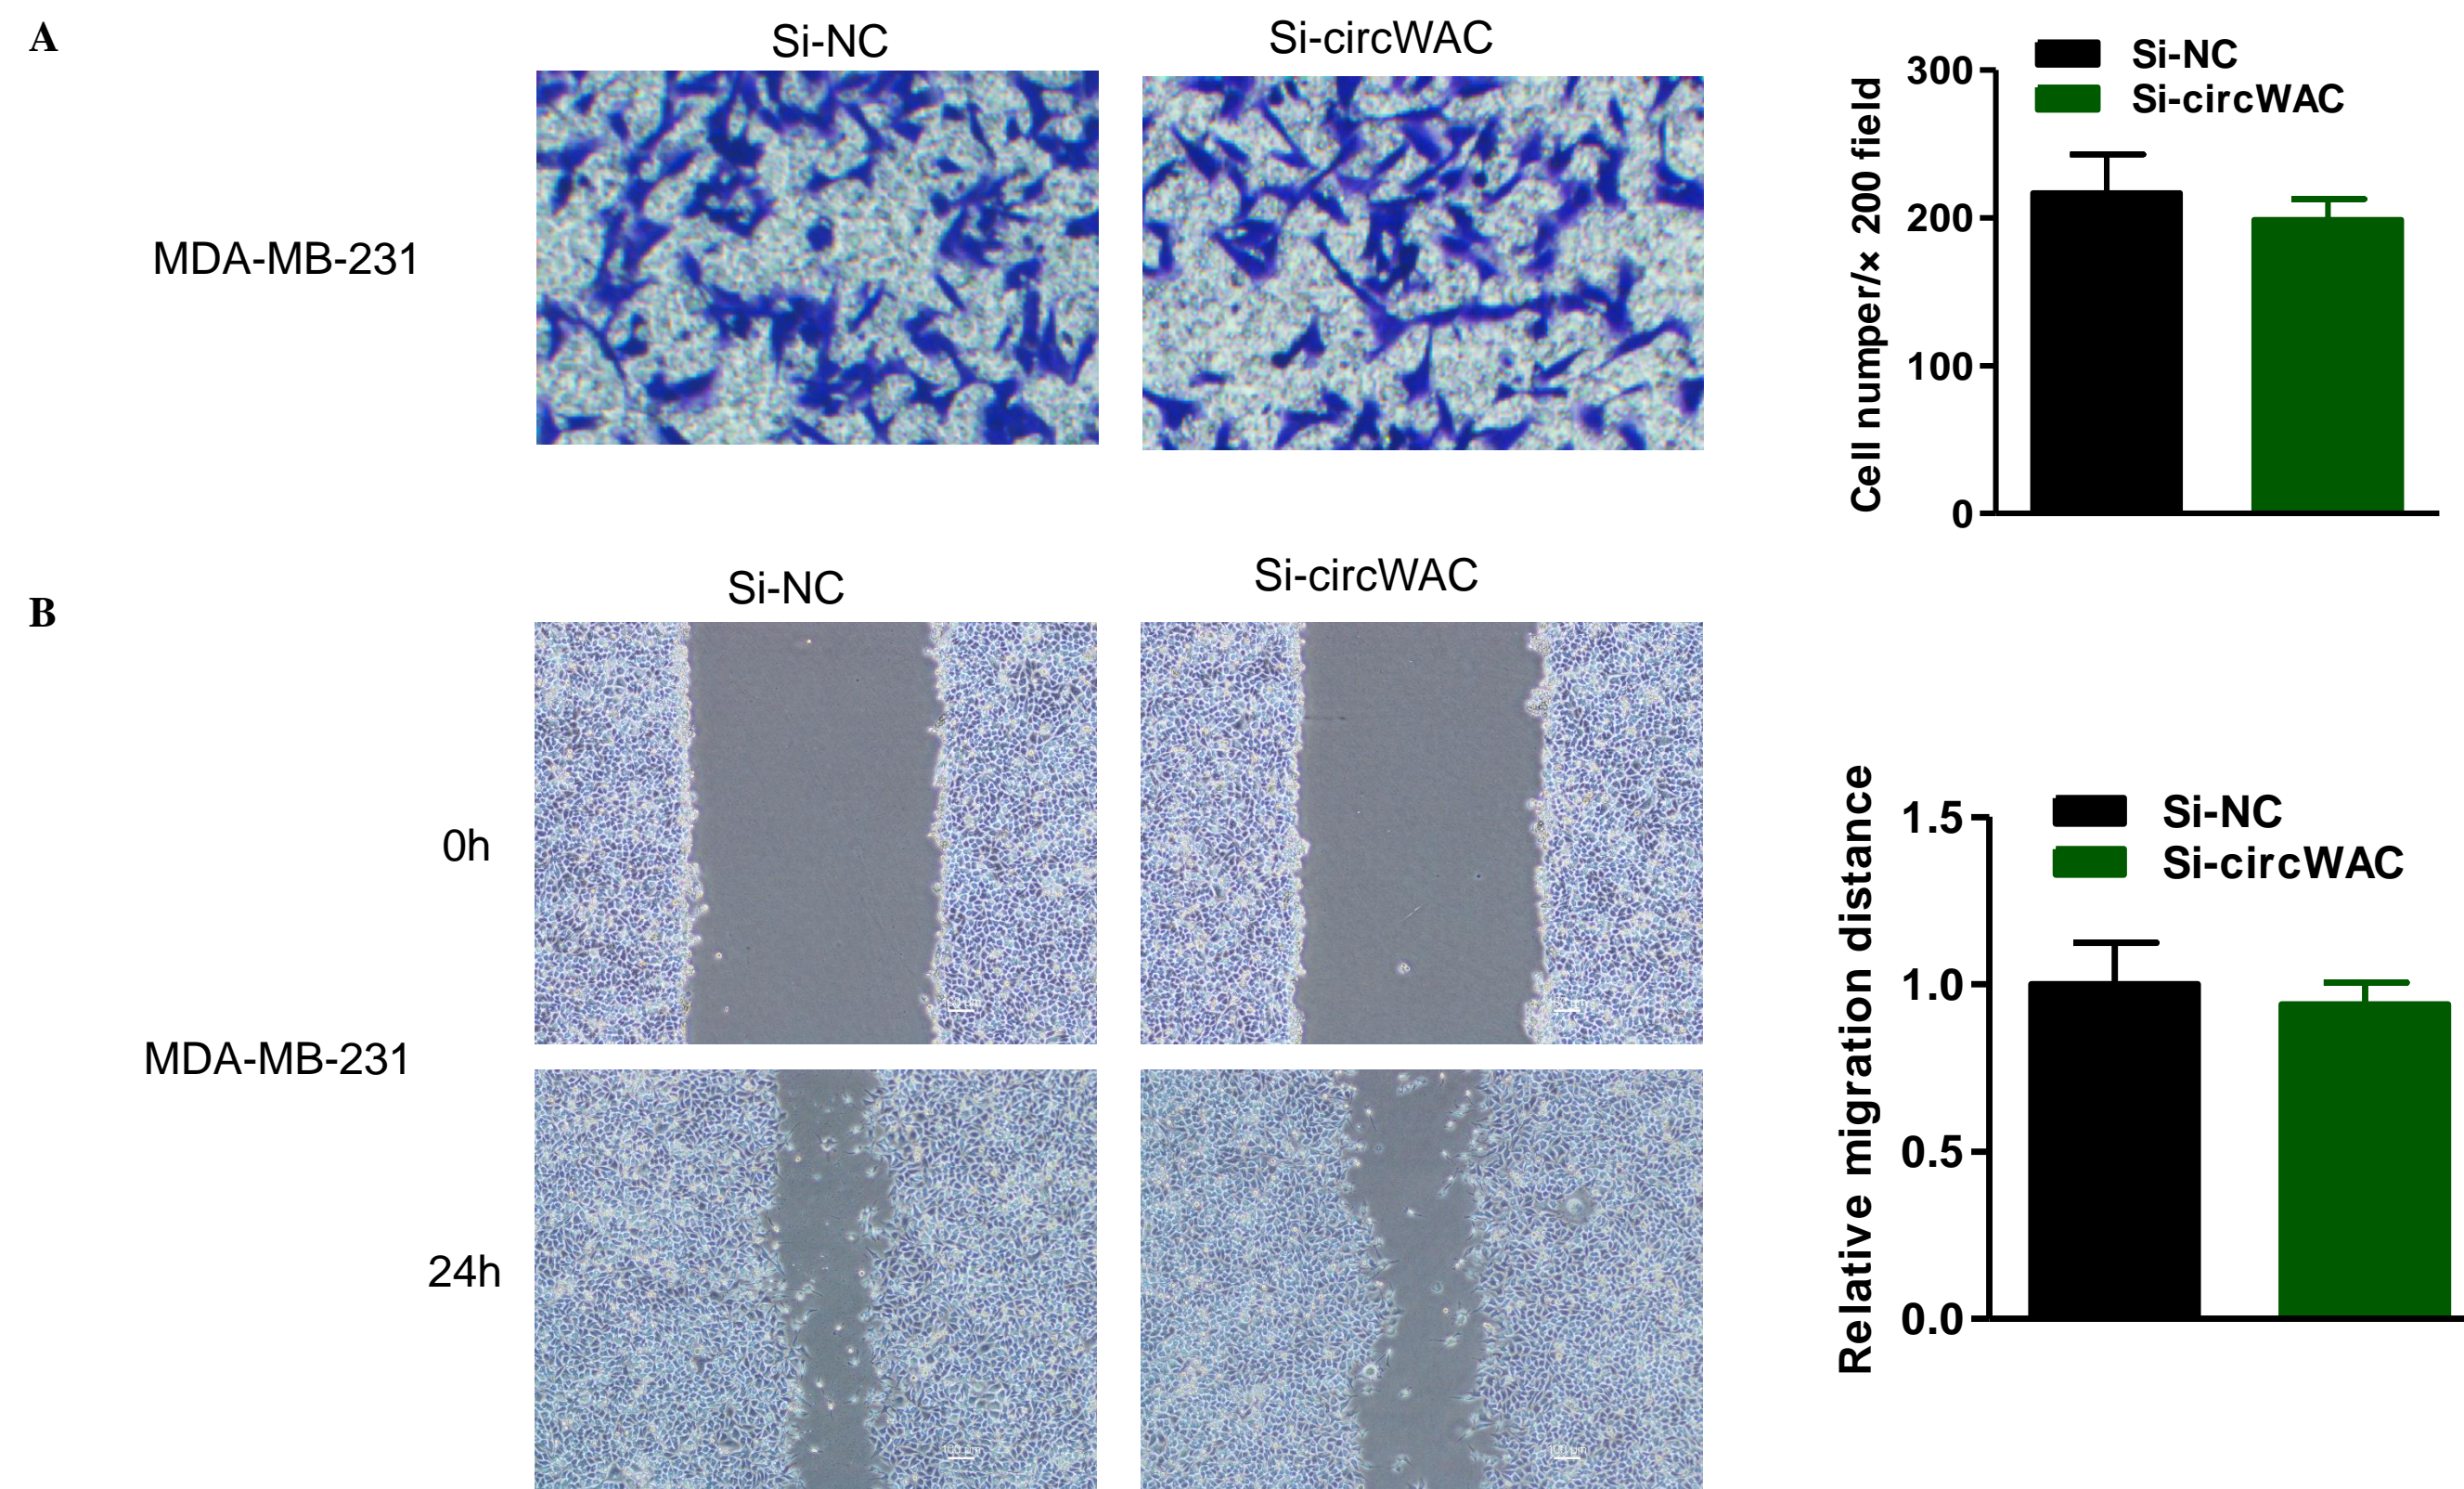

Supplementary figure 1. A. Cell invasion ability of MDA-MB-231 cells transfected with Si-NC or Si-circWAC was evaluated by transwell invasion assays. B. Wound healing assays of MDA-MB-231 cells transfected with Si-NC or Si-circWAC were performed to evaluate cell migration ability.

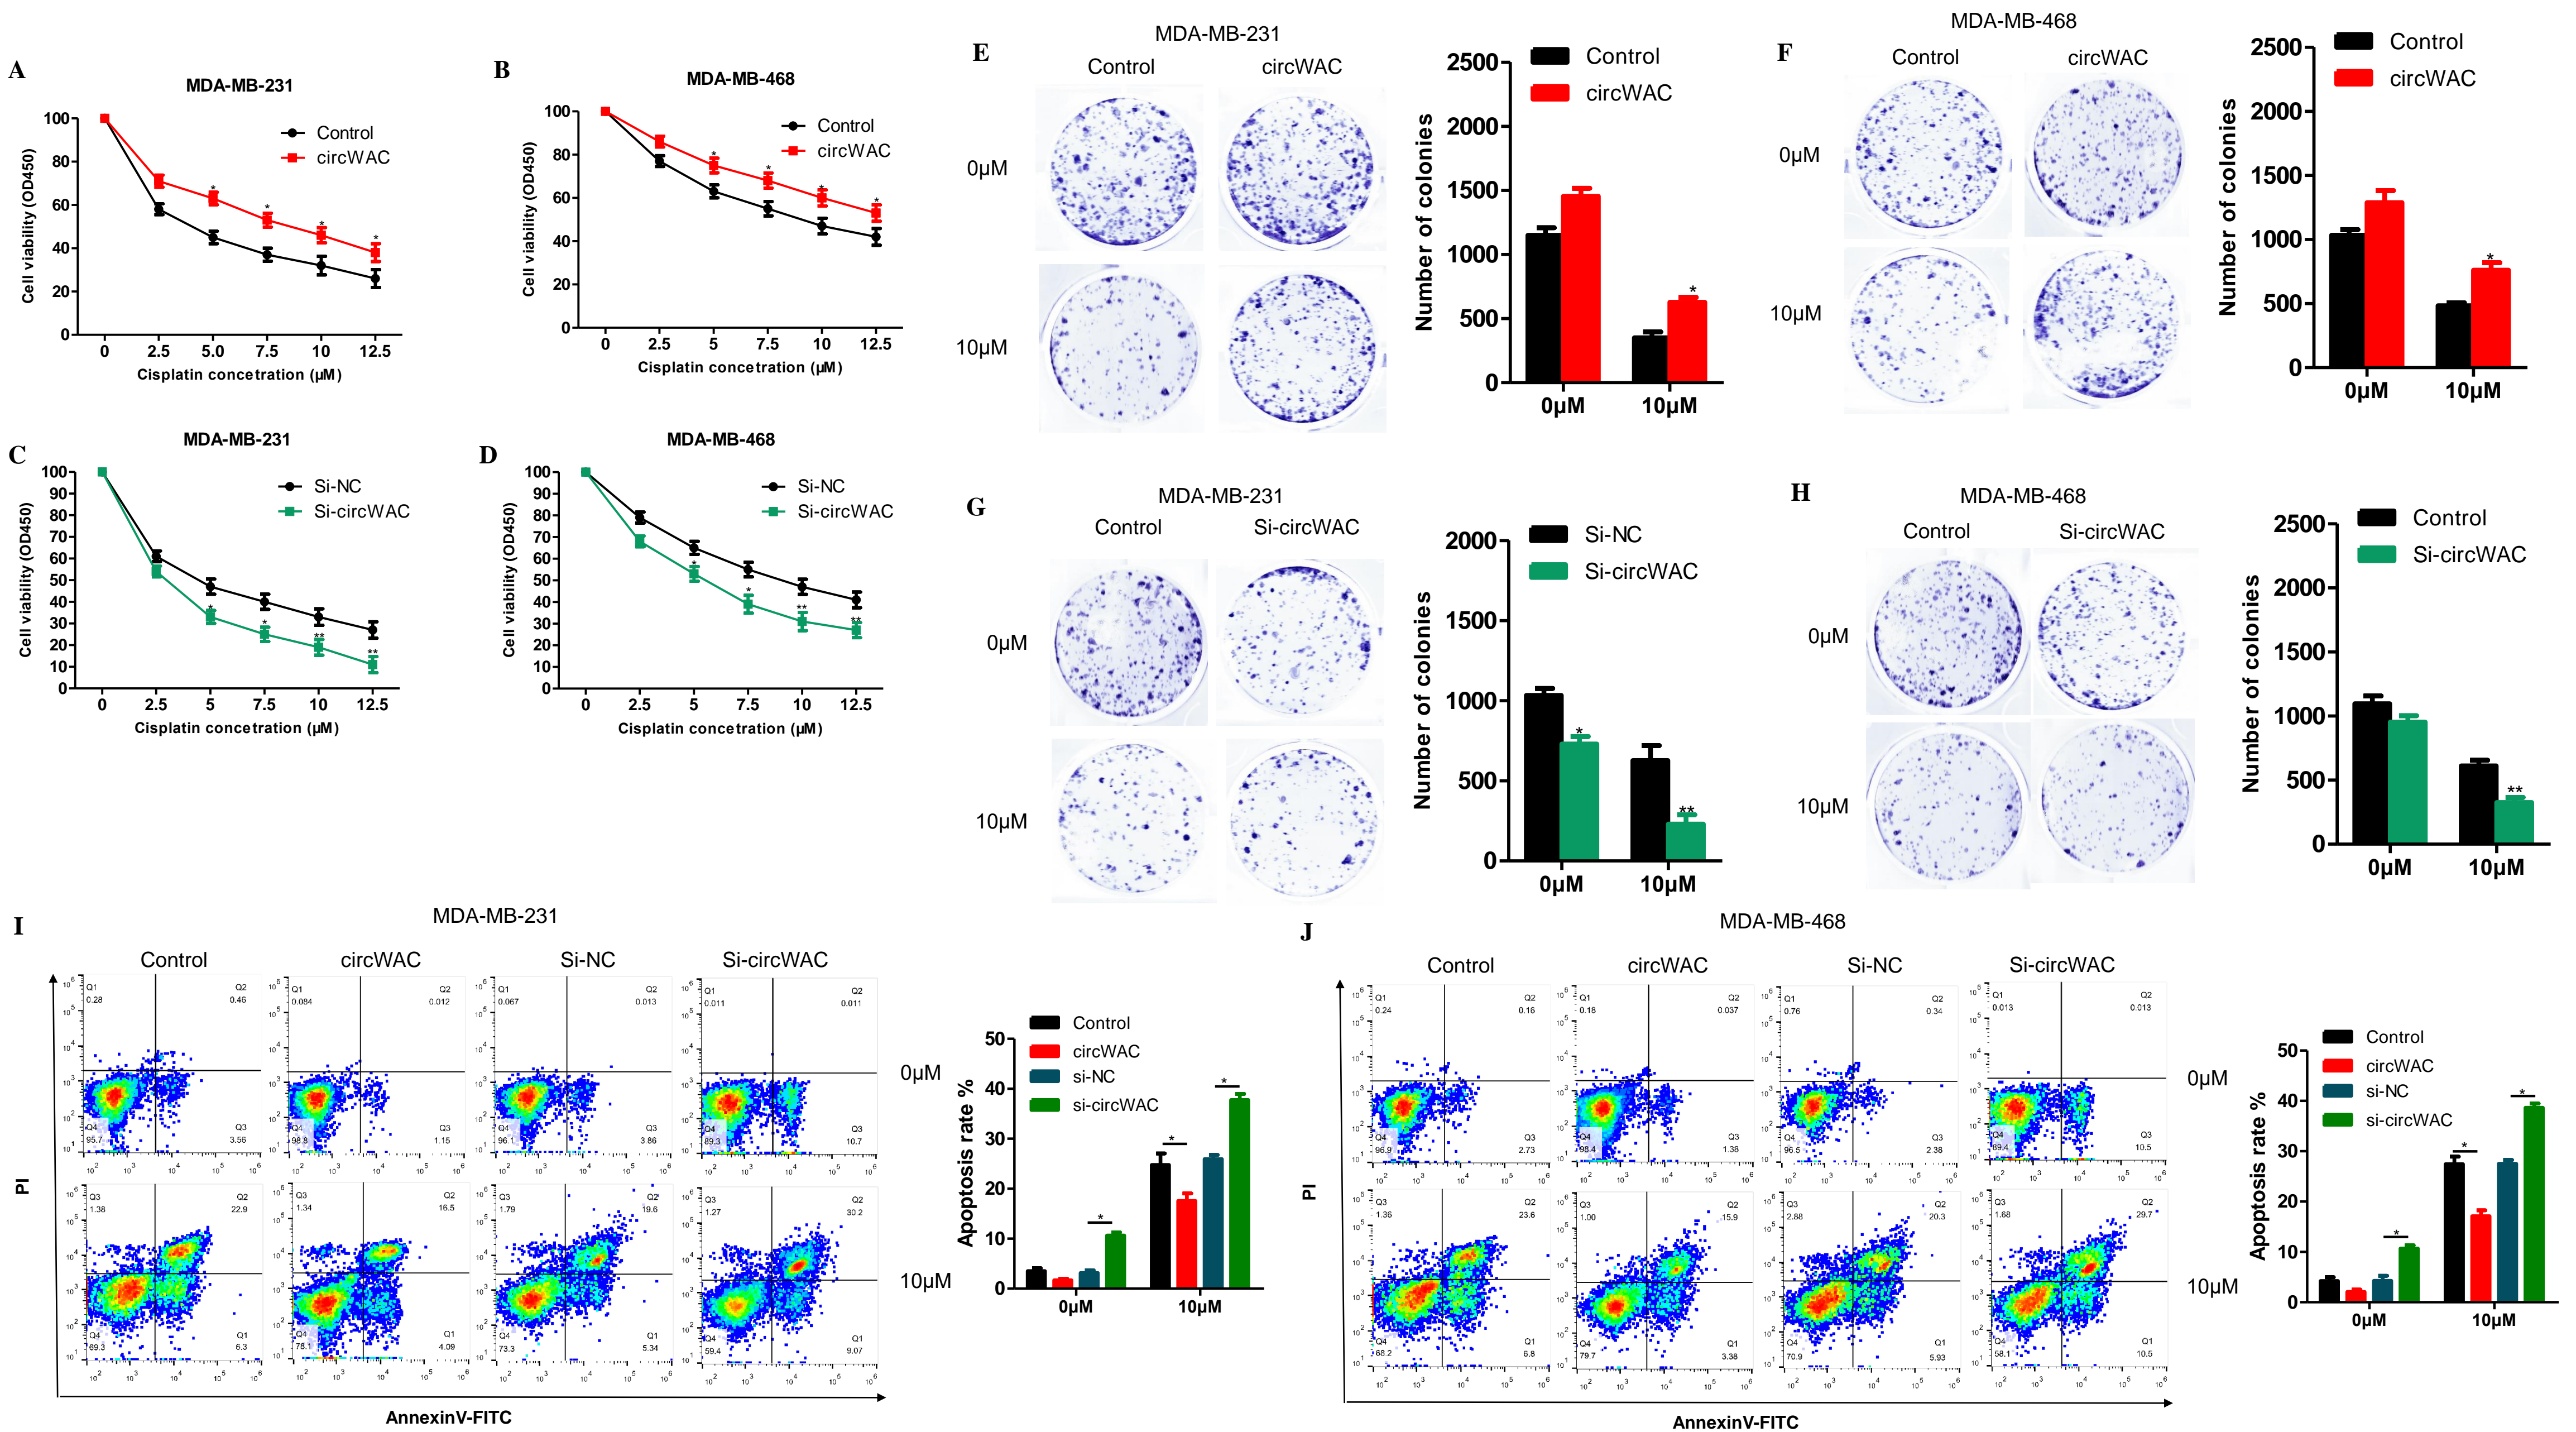

Supplementary figure 2. A-D. Cells were treated with cisplatin (concentrations of 0, 2.5, 5, 7.5, 10 and 12.5  $\mu\text{mol/L}$ ) for 24 h, and cell viability was evaluated by a CCK-8 assay. E-H. Cells were treated with cisplatin (0 and 10  $\mu\text{M}$ ) for 24 h, and cell viability was evaluated by a colony formation assay. I-J. Cells were treated with cisplatin (0 and 10  $\mu\text{M}$ ) for 24 h, and the apoptosis rate was analyzed via flow cytometry. The data are presented as the means  $\pm$  S.D. of at least three independent experiments. \* $P < 0.05$ , \*\* $P < 0.01$ , \*\*\* $P < 0.001$ .
